# Supplementary material for: A Pilot Clinical Study of Hyperacute Serum Treatment in Osteoarthritic Knee Joint: Cytokine Changes and Clinical Effects
Source: MDPI journal article supplement (doi:10.3390/cimb43020046), 2021-07-09
Supplement: s1 [file s1]

**Article Title:** A Pilot Clinical Study of Hyperacute Serum Treatment in Osteoarthritic Knee Joint: Cytokine Changes and Clinical Effects

**Journal name:** Knee Surgery, Sports Traumatology, Arthroscopy

**Name of the Authors:** Isabel Olmos Calvo 1,\*, Eszter Fodor 2, Dorottya Kardos 3, István Hornyák 3, Adél Hinsenkamp 3, Olga Kuten-Pella 1, Zsuzsanna Gyevnár 2, Gábor Erdélyi 4, Tamás Bárdos 4, Tamás Mirkó Paukovits 4, Krisztián Magos 4, György Béres 4, Stefan Nehrer 5 and Zsombor Lacza 2,3

**Affiliations:**

<sup>1</sup>OrthoSera GmbH, Dr. Karl-Dorrek-Straße 23-29, 3500 Krems an der Donau, Austria.

<sup>2</sup>Department of Sport Physiology, University of Physical Education, 44 Alkotás utca, 1123 Budapest, Hungary.

<sup>3</sup>Institute of Translational Medicine, Semmelweis University, 26 Üllői utca, 1085 Budapest, Hungary.

<sup>4</sup>Kastélypark Klinika, 15 Hajdú utca, 2890 Tata, Hungary.

<sup>5</sup>Center for Regenerative Medicine, Danube University, Dr. Karl-Dorrek-Straße 30, 3500 Krems an der Donau, Austria.

\*Correspondence: isabel.olmos@orthosera.com

**SUPPLEMENTARY DATA**

Table S1: List of the 39 measured cytokines and OA-related proteins with the mean expressed levels and standard errors (SEM).

| Abbreviation                           | Name                                     |        | Concentration (pg/ml) | SEM       | Description                                                                                                                                                                                |
|----------------------------------------|------------------------------------------|--------|-----------------------|-----------|--------------------------------------------------------------------------------------------------------------------------------------------------------------------------------------------|
| <b>1. Proinflammatory interleukins</b> |                                          |        |                       |           |                                                                                                                                                                                            |
| <b>IL-1<math>\beta</math></b>          | <b>Interleukin-1 <math>\beta</math></b>  | week 0 | 8,830                 | 0,922     | Proinflammatory cytokine; positive correlation with severity and with joint space; biomarker of the burden of OA; biomarker of the efficacy of intervention                                |
|                                        |                                          | week 1 | 8,566                 | 1,179     |                                                                                                                                                                                            |
|                                        |                                          | week 2 | 8,828                 | 1,030     |                                                                                                                                                                                            |
| <b>IL-6 Ra</b>                         | <b>Interleukin-6 receptor antagonist</b> | week 0 | 17 476,355            | 1 543,565 | Healthy chondrocytes produce low amount of IL-6; it inhibits type II collagen synthesis; plays a role in cartilage degradation; associates with an increased prevalence of osteophytes; it |
|                                        |                                          | week 1 | 16 370,347            | 1 186,035 |                                                                                                                                                                                            |
|                                        |                                          | week 2 | 15726,555             | 1271,857  |                                                                                                                                                                                            |

|              |                       |        |         |        |                                                                                                                                                                                                                                                                |
|--------------|-----------------------|--------|---------|--------|----------------------------------------------------------------------------------------------------------------------------------------------------------------------------------------------------------------------------------------------------------------|
|              |                       |        |         |        | causes changes in subchondral bone layer; diagnostic and prognostic biomarker of OA                                                                                                                                                                            |
| <b>IL-2</b>  | <b>Interleukin-2</b>  | week 0 | 179,208 | 12,818 | Significant concentration differences in IL-2, IL-5, MCP-1, and MIP-1 were found between subjects with advanced arthritis and subjects with little or no arthritis on the ICRS scale; IL-2 was only detected in four of the end-stage synovial fluid specimens |
|              |                       | week 1 | 204,048 | 35,778 |                                                                                                                                                                                                                                                                |
|              |                       | week 2 | 178,544 | 13,858 |                                                                                                                                                                                                                                                                |
| <b>IL-5</b>  | <b>Interleukin-5</b>  | week 0 | 19,945  | 4,422  | Produced by Th2 cells and mast cells; higher concentration in advanced OA; correlates with ICRS scale                                                                                                                                                          |
|              |                       | week 1 | 17,074  | 2,713  |                                                                                                                                                                                                                                                                |
|              |                       | week 2 | 16,703  | 2,763  |                                                                                                                                                                                                                                                                |
| <b>IL-7</b>  | <b>Interleukin-7</b>  | week 0 | 26,235  | 1,281  | Chondrocytes express IL-7 receptor and increase MMP and proteoglycan production after IL-7 stimulation; it increases with age in synovial fluid samples from OA patients; diagnostic biomarker of OA                                                           |
|              |                       | week 1 | 25,930  | 0,983  |                                                                                                                                                                                                                                                                |
|              |                       | week 2 | 26,335  | 1,097  |                                                                                                                                                                                                                                                                |
| <b>IL-12</b> | <b>Interleukin-12</b> | week 0 | 180,955 | 23,428 | Proinflammatory cytokine expressed by tissue infiltrated leukocytes; it shows an increased level in OA                                                                                                                                                         |
|              |                       | week 1 | 184,952 | 25,240 |                                                                                                                                                                                                                                                                |
|              |                       | week 2 | 183,987 | 25,846 |                                                                                                                                                                                                                                                                |
| <b>IL-15</b> | <b>Interleukin-15</b> | week 0 | 19,166  | 1,677  | Proinflammatory cytokine which contributes to inflammation in OA; it has an independent positive correlation                                                                                                                                                   |
|              |                       | week 1 | 20,373  | 1,913  |                                                                                                                                                                                                                                                                |
|              |                       | week 2 | 18,708  | 2,241  |                                                                                                                                                                                                                                                                |

|               |                        |        |           |         |                                                                                                                                                                                                                                                           |
|---------------|------------------------|--------|-----------|---------|-----------------------------------------------------------------------------------------------------------------------------------------------------------------------------------------------------------------------------------------------------------|
|               |                        |        |           |         | with WOMAC pain scores; potential diagnostic of OA, biomarker of OA in early disease development and burden.                                                                                                                                              |
| <b>IL-17a</b> | <b>Interleukin-17a</b> | week 0 | 27,478    | 2,206   | Inflammatory cytokine which affects chondrocytes by increasing the production of MMPs and inhibiting proteoglycan synthesis; positive correlation with radiographic images of lesions in OA                                                               |
|               |                        | week 1 | 31,571    | 2,909   |                                                                                                                                                                                                                                                           |
|               |                        | week 2 | 30,156    | 2,162   |                                                                                                                                                                                                                                                           |
| <b>IL-18</b>  | <b>Interleukin-18</b>  | week 0 | 117,877   | 11,395  | Positive correlation with disease severity; diagnostic biomarker of OA                                                                                                                                                                                    |
|               |                        | week 1 | 121,468   | 12,585  |                                                                                                                                                                                                                                                           |
|               |                        | week 2 | 125,950   | 12,430  |                                                                                                                                                                                                                                                           |
| <b>IL-22</b>  | <b>Interleukin-22</b>  | week 0 | 202,696   | 34,301  | Proinflammatory cytokine secreted by Th17, Th1, NK, NKT cells. Inflamed areas were associated with higher expression of IL-17 and IL-22, both correlated with the combined release of IL-6, IL-23, and TGFβ1; responsible of inflammation at the synovium |
|               |                        | week 1 | 170,649   | 23,132  |                                                                                                                                                                                                                                                           |
|               |                        | week 2 | 93,897    | 36,373  |                                                                                                                                                                                                                                                           |
| <b>IL-23</b>  | <b>Interleukin-23</b>  | week 0 | 1 487,900 | 161,345 | Proinflammatory cytokine expressed in subchondral bone marrow and in fibrous tissue replacing the marrow, potential therapeutic target in OA                                                                                                              |
|               |                        | week 1 | 1 536,334 | 134,462 |                                                                                                                                                                                                                                                           |
|               |                        | week 2 | 1313,739  | 98,164  |                                                                                                                                                                                                                                                           |
| <b>IL-31</b>  | <b>Interleukin-31</b>  | week 0 | 24,409    | 1,032   | Released by monocytes, macrophages, T                                                                                                                                                                                                                     |
|               |                        | week 1 | 24,156    | 1,018   |                                                                                                                                                                                                                                                           |

|                                          |                                                                                                        |        |         |         |                                                                                                                                                                                                                |
|------------------------------------------|--------------------------------------------------------------------------------------------------------|--------|---------|---------|----------------------------------------------------------------------------------------------------------------------------------------------------------------------------------------------------------------|
|                                          |                                                                                                        | week 2 | 23,462  | 0,817   | cells and dendritic cells, IL-31 may function as a proinflammatory cytokine involved in the recruitment of polymorphonuclear cells                                                                             |
| <b>2. Proinflammatory chemokines</b>     |                                                                                                        |        |         |         |                                                                                                                                                                                                                |
| <b>CCL-1</b>                             | <b>Chemokine (C-C motif) ligand 1</b>                                                                  | week 0 | 3,223   | 0,368   | High plasma concentration found in OA: it increases the expression of MMP-3 and MMP-13                                                                                                                         |
|                                          |                                                                                                        | week 1 | 3,140   | 0,286   |                                                                                                                                                                                                                |
|                                          |                                                                                                        | week 2 | 2,869   | 0,235   |                                                                                                                                                                                                                |
| <b>CCL-2/MCP-1</b>                       | <b>Chemokine (C-C motif) ligand 2 / Monocyte chemotactic protein 1</b>                                 | week 0 | 867,635 | 115,981 | It induces MMP3 expression and inhibits proteoglycan synthesis                                                                                                                                                 |
|                                          |                                                                                                        | week 1 | 787,776 | 78,802  |                                                                                                                                                                                                                |
|                                          |                                                                                                        | week 2 | 918,578 | 165,321 |                                                                                                                                                                                                                |
| <b>CCL-3/MIP-1<math>\alpha</math> OA</b> | <b>Chemokine (C-C motif) ligand 3 / Macrophage inflammatory protein 1- alpha</b>                       | week 0 | 261,050 | 13,872  | Potential serum OA biomarker; it stages the severity of joint damage                                                                                                                                           |
|                                          |                                                                                                        | week 1 | 268,700 | 11,794  |                                                                                                                                                                                                                |
|                                          |                                                                                                        | week 2 | 267,485 | 18,062  |                                                                                                                                                                                                                |
| <b>CCL-5/RANTES</b>                      | <b>Chemokine (C-C motif) ligand 5 /Regulated upon activation, normal T cell expressed and secreted</b> | week 0 | 110,326 | 23,982  | High concentration in OA synovial fluid; positive correlation with MMP-2, IL-6, IL-8 and MMP-1                                                                                                                 |
|                                          |                                                                                                        | week 1 | 98,407  | 18,770  |                                                                                                                                                                                                                |
|                                          |                                                                                                        | week 2 | 85,270  | 10,279  |                                                                                                                                                                                                                |
| <b>CXCL-8/IL-8</b>                       | <b>chemokine (C-X-C motif) ligand 8/ Interleukin-8</b>                                                 | week 0 | 619,984 | 459,445 | Stimulates osteoclastogenesis and bone resorption; depresses the activity of osteoblasts; significantly increased levels in synovial fluid of OA patients; it can explain bone loss and cartilage injury in OA |
|                                          |                                                                                                        | week 1 | 228,681 | 131,866 |                                                                                                                                                                                                                |
|                                          |                                                                                                        | week 2 | 178,606 | 74,621  |                                                                                                                                                                                                                |
| <b>CXCL-10/IP-10</b>                     | <b>Chemokine (C-X-C motif) ligand-10/Interferon gamma-induced protein 10</b>                           | week 0 | 254,469 | 98,628  | May play a role in the pathophysiology of OA; levels found in plasma and synovial fluid                                                                                                                        |
|                                          |                                                                                                        | week 1 | 270,975 | 69,819  |                                                                                                                                                                                                                |
|                                          |                                                                                                        | week 2 | 171,303 | 27,743  |                                                                                                                                                                                                                |

|                                |                                               |        |               |             |                                                                                                                                                                                |
|--------------------------------|-----------------------------------------------|--------|---------------|-------------|--------------------------------------------------------------------------------------------------------------------------------------------------------------------------------|
|                                |                                               |        |               |             | correlates with radiographic severity in knee OA                                                                                                                               |
| Fractalkine/<br>CX3CL1         | Fractalkine/chemokine (C-X3-C motif) ligand 1 | week 0 | 1 351,828     | 483,418     | Fractalkine in synovial fluid and serum may serve as a OA biomarker for reflecting symptomatic severity; it regulates OA fibroblast migration                                  |
|                                |                                               | week 1 | 254,469       | 98,628      |                                                                                                                                                                                |
|                                |                                               | week 2 | 1302,739      | 469,306     |                                                                                                                                                                                |
| 3. Other inflammatory proteins |                                               |        |               |             |                                                                                                                                                                                |
| CD-163                         | Cluster of Differentiation 163                | week 0 | 1 876 059,862 | 118 418,722 | Soluble macrophage biomarker that reflects the abundance of activated macrophages; it correlates with structural progression, and together with CD14, pain of OA               |
|                                |                                               | week 1 | 1 791 750,028 | 128 284,187 |                                                                                                                                                                                |
|                                |                                               | week 2 | 1776789,080   | 120059,479  |                                                                                                                                                                                |
| TNF $\alpha$                   | Tumor necrosis factor alpha                   | week 0 | 12,441        | 0,896       | It increases the synthesis of IL-6, IL-8, RANTES and VEGF; it shows a positive correlation with pain; OA burden of disease biomarker and biomarker of efficacy of intervention |
|                                |                                               | week 1 | 12,414        | 0,742       |                                                                                                                                                                                |
|                                |                                               | week 2 | 11,819        | 0,819       |                                                                                                                                                                                |
| OSM                            | Oncostatin-M                                  | week 0 | 1 293,207     | 154,720     | Contributes to the pathogenesis of OA as overexpression of OSM induces joint damage due to cartilage destruction; it induces osteophyte formation                              |
|                                |                                               | week 1 | 1 113,583     | 93,311      |                                                                                                                                                                                |
|                                |                                               | week 2 | 1088,947      | 73,334      |                                                                                                                                                                                |
| LIF                            | Leukemia inhibitor factor                     | week 0 | 41,744        | 3,009       | It degrades proteoglycans and regulates bone formation and resorption; Biomarker of OA                                                                                         |
|                                |                                               | week 1 | 42,657        | 2,748       |                                                                                                                                                                                |
|                                |                                               | week 2 | 41,827        | 2,956       |                                                                                                                                                                                |

|                                   |                                                   |        |             |            |                                                                                                                                                                                                                                                                                         |
|-----------------------------------|---------------------------------------------------|--------|-------------|------------|-----------------------------------------------------------------------------------------------------------------------------------------------------------------------------------------------------------------------------------------------------------------------------------------|
|                                   |                                                   |        |             |            | (together with IL-11 and OP-1, while IL-1, IL-6, IL-8 are biomarkers of RA)                                                                                                                                                                                                             |
| Resistin/<br>ADSF                 | Resistin/adipose tissue-specific secretory factor | week 0 | 7 634,535   | 4 392,447  | Resistin is present in OA joints and is released from OA cartilage. Levels of resistin in synovial fluid are associated with inflammatory and catabolic factors and may serve as a potential biomarker for reflecting the disease severity and cartilage degenerative extent of knee OA |
|                                   |                                                   | week 1 | 11 547,598  | 8 823,966  |                                                                                                                                                                                                                                                                                         |
|                                   |                                                   | week 2 | 7090,042    | 4927,750   |                                                                                                                                                                                                                                                                                         |
| VEFG-A                            | Vascular endothelial growth factor A              | week 0 | 658,332     | 117,431    | Produced by hypotrophic chondrocytes, macrophages and synovial fibroblasts. Levels in synovial fluid and plasma correlates with OA severity                                                                                                                                             |
|                                   |                                                   | week 1 | 565,015     | 66,860     |                                                                                                                                                                                                                                                                                         |
|                                   |                                                   | week 2 | 685,542     | 131,738    |                                                                                                                                                                                                                                                                                         |
| 4. Anti-inflammatory interleukins |                                                   |        |             |            |                                                                                                                                                                                                                                                                                         |
| IL-1 Ra                           | Interleukin-1 receptor antagonist                 | week 0 | 10 197,060  | 9 044,266  | It uses the receptor of IL-1, a proinflammatory cytokines, which has pivotal role in the pathogenesis of OA. IL-1Ra opens a promising therapeutic perspective for patients with OA                                                                                                      |
|                                   |                                                   | week 1 | 1 280,844   | 623,155    |                                                                                                                                                                                                                                                                                         |
|                                   |                                                   | week 2 | 1001,694    | 284,733    |                                                                                                                                                                                                                                                                                         |
| IL-4 Ra                           | Interleukin-4 receptor antagonist                 | week 0 | 453,143     | 29,728     | It uses the receptor of IL-4, an anti-inflammatory cytokine, which alone or together with IL-10, inhibits the apoptosis of chondrocytes; IL-4Ra shows elevated                                                                                                                          |
|                                   |                                                   | week 1 | 457,529     | 27,680     |                                                                                                                                                                                                                                                                                         |
|                                   |                                                   | week2  | 453,1089644 | 35,9126296 |                                                                                                                                                                                                                                                                                         |

|                                   |                            |        |            |           |                                                                                                                                                                                                                                     |
|-----------------------------------|----------------------------|--------|------------|-----------|-------------------------------------------------------------------------------------------------------------------------------------------------------------------------------------------------------------------------------------|
|                                   |                            |        |            |           | levels in OA serum and decreases the synthesis of IL-1β, TNFα, IL-6, PGE2 and iNOS                                                                                                                                                  |
| IL-10                             | Interleukin-10             | week 0 | 4,892      | 0,513     | Anti-inflammatory cytokine that, together with IL-4, inhibits the apoptosis of chondrocytes; it stimulates the synthesis of collagen type II and ACAN, inhibits MMPs; it may serve as a prognostic biomarker                        |
|                                   |                            | week 1 | 4,824      | 0,503     |                                                                                                                                                                                                                                     |
|                                   |                            | week 2 | 5,027      | 0,464     |                                                                                                                                                                                                                                     |
| IL-13                             | Interleukin-13             | week 0 | 990,858    | 112,237   | It is a potentially useful marker in the therapeutic treatment of OA as it can reduce the production of proinflammatory cytokines, MMPs and induce the production of IL-1Ra                                                         |
|                                   |                            | week 1 | 935,396    | 107,221   |                                                                                                                                                                                                                                     |
|                                   |                            | week 2 | 981,725    | 112,207   |                                                                                                                                                                                                                                     |
| 5. Matrix metallorpoteases (MMPs) |                            |        |            |           |                                                                                                                                                                                                                                     |
| MMP-1                             | Matrix metalloproteinase-1 | week 0 | 20 864,725 | 3 445,281 | Higher concentration in OA synovial fluid than in healthy donor's; it is mainly found in superficial cartilage promoting cartilage degradation; it shows positive correlation with MMP-2, IL-6, IL-8, CCL-5 and radiographic scores |
|                                   |                            | week 1 | 17 428,380 | 3 139,476 |                                                                                                                                                                                                                                     |
|                                   |                            | week 2 | 21135,543  | 3758,370  |                                                                                                                                                                                                                                     |
| MMP-2                             | Matrix metalloproteinase-2 | week 0 | 54 494,074 | 873,746   | Higher concentration in OA synovial fluid than in healthy donor's inducing cartilage degradation; it shows positive                                                                                                                 |
|                                   |                            | week 1 | 56 489,352 | 984,161   |                                                                                                                                                                                                                                     |
|                                   |                            | week 2 | 56088,676  | 1289,565  |                                                                                                                                                                                                                                     |

|                                          |                                     |        |             |                 | correlation with<br>MMP-1                                                                                                                                                                                                                                               |
|------------------------------------------|-------------------------------------|--------|-------------|-----------------|-------------------------------------------------------------------------------------------------------------------------------------------------------------------------------------------------------------------------------------------------------------------------|
| MMP-3                                    | Matrix<br>metalloproteinase-3       | week 0 | 44 835,023  | 3 017,750       | Higher<br>concentration in OA<br>synovial fluid than<br>in healthy donor's<br>inducing cartilage<br>degradation; it<br>shows positive<br>correlation with OA<br>severity                                                                                                |
|                                          |                                     | week 1 | 43 226,792  | 2 951,829       |                                                                                                                                                                                                                                                                         |
|                                          |                                     | week 2 | 42943,606   | 2390,735        |                                                                                                                                                                                                                                                                         |
| MMP-9                                    | Matrix<br>metalloproteinase-9       | week 0 | 5693,470    | 3405,017        | Higher<br>concentration in OA<br>synovial fluid than<br>in healthy donor's<br>inducing cartilage<br>degradation                                                                                                                                                         |
|                                          |                                     | week 1 | 7 892,046   | 6 695,381       |                                                                                                                                                                                                                                                                         |
|                                          |                                     | week 2 | 2992,058    | 2033,618        |                                                                                                                                                                                                                                                                         |
| MMP-13                                   | Matrix<br>metalloproteinase-13      | week 0 | 1 093,847   | 1 106,511       | It degrades<br>cartilage, mainly<br>type II and IX<br>collagen; it is found<br>in higher<br>concentration in<br>deep layers of OA<br>cartilage;<br>overexpressed in<br>early OA and down-<br>regulated in late<br>stage OA; it<br>correlates with OA<br>lesion severity |
|                                          |                                     | week 1 | 27,382      | 21,486          |                                                                                                                                                                                                                                                                         |
|                                          |                                     | week 2 | 1 122,871   | 29,899          |                                                                                                                                                                                                                                                                         |
| 6. Cartilage and bone remodeling markers |                                     |        |             |                 |                                                                                                                                                                                                                                                                         |
| COL1A1                                   | Collagen type I $\alpha$ 1<br>chain | week 0 | 28 685,383  | 1 837,766       | COL1A1 defect<br>leads to rapidly<br>progressive OA in<br>mouse models                                                                                                                                                                                                  |
|                                          |                                     | week 1 | 27 665,064  | 1 885,586       |                                                                                                                                                                                                                                                                         |
|                                          |                                     | week 2 | 28042,61107 | 1625,81087<br>6 |                                                                                                                                                                                                                                                                         |
| ACAN                                     | Aggrecan                            | week 0 | 923,693     | 108,034         | Suitable for the<br>monitoring of<br>cartilage damage; it<br>shows positive<br>correlation with<br>joint damage but<br>not with clinical<br>parameters                                                                                                                  |
|                                          |                                     | week 1 | 936,220     | 110,573         |                                                                                                                                                                                                                                                                         |
|                                          |                                     | week 2 | 940,339     | 128,716         |                                                                                                                                                                                                                                                                         |
| ON/SPARC                                 |                                     | week 0 | 301 735,075 | 38 193,107      | TGF $\beta$ 1 and IL-1 $\beta$ ,<br>regulate the<br>production of                                                                                                                                                                                                       |
|                                          |                                     | week 1 | 317 977,738 | 61 439,522      |                                                                                                                                                                                                                                                                         |



|                                                                                       |                                                                                                    |        |            |             |                                                                                                                                                                                                                                   |
|---------------------------------------------------------------------------------------|----------------------------------------------------------------------------------------------------|--------|------------|-------------|-----------------------------------------------------------------------------------------------------------------------------------------------------------------------------------------------------------------------------------|
| <b>Osteonectin/secreted protein acidic and rich in cysteine</b>                       |                                                                                                    |        |            |             | SPARC by chondrocytes at pre- and posttranslational levels; SPARC synthesis is markedly enhanced in arthritic joints and it is associated with radiographic OA status (except previous meniscectomy) when found in synovial fluid |
|                                                                                       |                                                                                                    | week 2 | 311872,596 | 82818,26005 |                                                                                                                                                                                                                                   |
| <b>7. Osteoarthritis biomarkers, which are extremely high in Rheumatoid Arthritis</b> |                                                                                                    |        |            |             |                                                                                                                                                                                                                                   |
| <b>IFN<math>\gamma</math></b>                                                         | <b>Interferon gamma</b>                                                                            | week 0 | 38,892     | 12,920      | It inhibits IL-1-induced MMP-3 expression in healthy chondrocytes; decreased IFN $\gamma$ level in OA chondrocytes in contrast to higher concentration in RA                                                                      |
|                                                                                       |                                                                                                    | week 1 | 34,541     | 14,151      |                                                                                                                                                                                                                                   |
|                                                                                       |                                                                                                    | week 2 | 27,071     | 4,315       |                                                                                                                                                                                                                                   |
| <b>IL-33</b>                                                                          | <b>Interleukin-33</b>                                                                              | week 0 | 24,409     | 7,827       | Inflammatory cytokine; potential marker of RA                                                                                                                                                                                     |
|                                                                                       |                                                                                                    | week 1 | 23,111     | 8,986       |                                                                                                                                                                                                                                   |
|                                                                                       |                                                                                                    | week 2 | 15,710     | 2,288       |                                                                                                                                                                                                                                   |
| <b>TRANCE/RANK L</b>                                                                  | <b>TNF-related activation-induced cytokine/Receptor activator of nuclear factor kappa-B ligand</b> | week 0 | 98,463     | 34,520      | OPG/RANKL/RANK system is important in the balance between bone formation and resorption; it plays a role in subchondral bone metabolism; it is involved in OA progression                                                         |
|                                                                                       |                                                                                                    | week 1 | 96,707     | 39,183      |                                                                                                                                                                                                                                   |
|                                                                                       |                                                                                                    | week 2 | 61,864     | 9,606       |                                                                                                                                                                                                                                   |

Table S2. Inclusion and exclusion criteria of osteoarthritic patients included in this hyperacute serum IA injection trial.

| Inclusion Criteria                                                                                                                                                                 | Exclusion Criteria                                                                                                                                                                                                                                                                                                          |
|------------------------------------------------------------------------------------------------------------------------------------------------------------------------------------|-----------------------------------------------------------------------------------------------------------------------------------------------------------------------------------------------------------------------------------------------------------------------------------------------------------------------------|
| 1. Presence of early or low-grade knee OA with KL = 2 or 3 in the index knee evidenced by standing radiographs and clinical examination up to 3 months before the study treatment. | 1. Body Mass Index >40                                                                                                                                                                                                                                                                                                      |
| 2. Male or female $\geq 18$ and $\leq 70$ years old at time of injection.                                                                                                          | 2. Any documented clinically significant condition (e.g., diabetes, malignancy), finding, or psychiatric illness at screening which could compromise patient safety or interfere with the assessment of the safety and treatment effects of the study injection.                                                            |
| 3. Minimum 4 points from the maximum 10 points on VAS scale up to 3 months before the study treatment, and the pain is caused by OA.                                               | 3. Any intra-articular therapy in the index knee within 6 months prior to screening, systemic steroid use within 3 weeks of screening.                                                                                                                                                                                      |
| 4. Clinical examination, which confirms, that the etiology of the pain is attributable to OA                                                                                       | 4. Diagnosed with rheumatoid arthritis, Reiter's syndrome, psoriatic arthritis, gout, ankylosing spondylitis, chondromalacia, arthritis secondary to other inflammatory diseases, or of metabolic origin; HIV, viral hepatitis; chondrocalcinosis, Paget's disease, villonodular synovitis, and other non-OA joint disease. |
| 5. Inflammatory arthropathy is not presented.                                                                                                                                      | 5. Presence of active infection or massive acute inflammation in the knee immediately preceding treatment injection.                                                                                                                                                                                                        |
| 6. In case of chronic liver or kidney diseases certificate is needed about the stabile state of the disease during the last 6 months.                                              | 6. Moderate and severe anemia, thrombocytopenia or polycythemia (Hemoglobin >17 g/dl or <11 g/dl and/or platelet number >500,000 or <100,000 / $\mu$ l.)                                                                                                                                                                    |
|                                                                                                                                                                                    | 7. Patients with untreated renal or kidney dysfunction and dialysis patients.                                                                                                                                                                                                                                               |
|                                                                                                                                                                                    | 8. Pregnant or nursing mothers or women who are planning on getting pregnant during the time they will be participating in the study.                                                                                                                                                                                       |
|                                                                                                                                                                                    | 9. Known drug or alcohol dependence currently or within the last year.                                                                                                                                                                                                                                                      |
|                                                                                                                                                                                    | 10. Patients under therapeutic doses of anticoagulant therapy (e.g. Warfarin, Dabigatran, Enoxaparin) and patients with coagulopathy. Patients with platelet aggregation inhibitory therapy (e.g. aspirin, clopidogrel) are not excluded.                                                                                   |
|                                                                                                                                                                                    | 11. Lack of opportunity to travel (e.g. there and back to checkups) or lack of co-operation to participate in treatments / examinations.                                                                                                                                                                                    |

|  |                                                |
|--|------------------------------------------------|
|  | 12. An advanced or acute phase malignancy.     |
|  | 13. Blood disorders (e.g. sickle cell anemia). |

Table S3. Patient information.

|                                              |              |
|----------------------------------------------|--------------|
| Number of patients (n)                       | 24           |
| Female sex (n)                               | 13           |
| Mean age (years), standard deviation (years) | 49,67 ± 9,54 |
